# Supplementary material
Source: PubMed Central journal article supplement (PMC5965259)
Supplement: NIHMS967105-supplement-Supplement.pdf [file NIHMS967105-supplement-Supplement.pdf]

## Supporting Information

### Species-selective pyrimidineamine inhibitors of *Trypanosoma brucei* S-adenosylmethionine decarboxylase.

Oleg A. Volkov,<sup>1,&</sup> Anthony J. Brockway,<sup>2,&</sup> Stephen A. Wring,<sup>3</sup> Michael Peel,<sup>3</sup> Zhe Chen,<sup>4</sup>  
Margaret A. Phillips,<sup>1,2</sup> and Jef K. De Brabander<sup>2</sup>

Departments of <sup>1</sup>Pharmacology, <sup>2</sup>Biochemistry, and <sup>4</sup>Biophysics, University of Texas  
Southwestern Medical Center, 6001 Forest Park Road, Dallas, Texas 75390-9041, United States  
<sup>3</sup>Scynexis, Inc. (now Avista Pharma Solutions), 3501 Tricenter Boulevard, Suite C,  
Durham, North Carolina 27713, United States

<sup>&</sup>These authors contributed equally to this work

## Table of Contents

Table S1. Biological activity data for pyrimidineamine analogs.

Table S2. Crystallographic diffraction data and refinement statistics for the **44**-bound *T. brucei*  
AdoMetDC/prozyme crystal structure.

Figure S1. Placement of a ligand into the catalytic site of *Tb*AdoMetDC/prozyme co-crystallized  
with **44**.

H and <sup>13</sup>C NMR spectra

References

**Table S1. Biological activity data for pyrimidineamine analogs**

| Chemical structure                                                                                                                                                  | Manuscript number | Code number | <i>Tb</i> IC <sub>50</sub> pH 6.8, uM <sup>b</sup> | <i>Tb</i> IC <sub>50</sub> pH 7.2, uM <sup>c</sup> | <i>Tb</i> IC <sub>50</sub> pH 7.7, uM <sup>d</sup> | <i>Hs</i> IC <sub>50</sub> pH 7.2, uM <sup>e</sup> | pK <sub>a</sub> (N1) <sup>f</sup> | <i>Tb</i> 427 EC <sub>50</sub> , uM <sup>g</sup> | EC <sub>50</sub> Hill slope | Source      |
|---------------------------------------------------------------------------------------------------------------------------------------------------------------------|-------------------|-------------|----------------------------------------------------|----------------------------------------------------|----------------------------------------------------|----------------------------------------------------|-----------------------------------|--------------------------------------------------|-----------------------------|-------------|
| 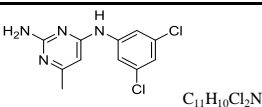<br>C <sub>11</sub> H <sub>10</sub> Cl <sub>2</sub> N <sub>4</sub>                 | 7                 | UTSAM30     | 0.5 (0.42–0.6)                                     | 3.7 (3.3–4.1)                                      | 36 (29–44)                                         | 27% at 180                                         | 7.3                               | 5.6 (4.5–7.1)                                    | -1.9                        | Maybridge   |
| <br>C <sub>10</sub> H <sub>8</sub> Cl <sub>2</sub> N <sub>4</sub>                  | 8                 | UTSAM473    | nd                                                 | 13 (11–15)                                         | 134 (96–188)                                       | >180                                               | 6.6                               | 9.9 (7.7–13)                                     | -1.8                        | synthesized |
| <br>C <sub>12</sub> H <sub>12</sub> Cl <sub>2</sub> N <sub>4</sub>                 | 9                 | UTSAM571    | 0.51 (0.46–0.56)                                   | 3 (2.7–3.3)                                        | 32 (29–36)                                         | 36% at 180                                         | 7.1                               | 4.7 (4.1–5.4)                                    | -2.9                        | synthesized |
| <br>C <sub>13</sub> H <sub>14</sub> Cl <sub>2</sub> N <sub>4</sub>                 | 10                | UTSAM574    | 1.9 (1.7–2.2)                                      | 12 (10–14)                                         | 187 (154–225)                                      | >180                                               | 7.0                               | 4.7 (3.9–5.8)                                    | -1.6                        | synthesized |
| <br>C <sub>16</sub> H <sub>12</sub> Cl <sub>2</sub> N <sub>4</sub>                 | 11                | UTSAM569    | 4.6 (3.8–5.6)                                      | 24% at 21                                          | >21                                                | >21                                                | 6.1                               | 7.2 (6.0–8.5)                                    | -1.6                        | synthesized |
| <br>C <sub>14</sub> H <sub>15</sub> Cl <sub>2</sub> N <sub>5</sub> O               | 12                | UTSAM580    | 31% at 180                                         | >180                                               | >180                                               | >180                                               | 6.0                               | 13 (10–17)                                       | -4.5                        | synthesized |
| <br>C <sub>10</sub> H <sub>7</sub> Cl <sub>3</sub> N <sub>4</sub>                 | 13                | UTSAM533    | nd                                                 | >180                                               | >180                                               | >180                                               | -2.2                              | 8.9 (7.3–11)                                     | -2.4                        | synthesized |
| <br>C <sub>11</sub> H <sub>7</sub> Cl <sub>2</sub> F <sub>3</sub> N <sub>4</sub> | 14                | UTSAM534    | nd                                                 | >180                                               | >180                                               | >180                                               | -3.3                              | 10 (7.5–14)                                      | -4.6                        | synthesized |
| <br>C <sub>13</sub> H <sub>12</sub> Cl <sub>2</sub> N <sub>4</sub>               | 15                | UTSAM578    | 1.7 (1.5–2.0)                                      | 12 (11–14)                                         | >21                                                | >21                                                | 6.8                               | 19 (15–24)                                       | -0.96                       | synthesized |
| <br>C <sub>12</sub> H <sub>12</sub> Cl <sub>2</sub> N <sub>4</sub>               | 16                | UTSAM576    | 0.88 (0.77–0.99)                                   | 4.8 (4.5–5.2)                                      | 39 (33–48)                                         | 25% at 180                                         | 7.0                               | 17 (14–20)                                       | -2.0                        | synthesized |
| <br>C <sub>11</sub> H <sub>9</sub> Cl <sub>2</sub> N <sub>3</sub>                | 17                | UTSAM542    | >180                                               | >180                                               | >180                                               | >180                                               | na                                | 96 (66–140)                                      | -1.2                        | synthesized |
| <br>C <sub>11</sub> H <sub>9</sub> Cl <sub>2</sub> N <sub>3</sub>                | 18                | UTSAM556    | 34% at 180                                         | >180                                               | >180                                               | >180                                               | na                                | 38 (31–47)                                       | -4.7                        | synthesized |
| <br>C <sub>12</sub> H <sub>11</sub> Cl <sub>2</sub> N <sub>3</sub>               | 19                | UTSAM558    | 186 (160–217)                                      | 24% at 180                                         | >180                                               | >180                                               | na                                | 13 (8.2–22)                                      | -5.3                        | synthesized |
| <br>C <sub>12</sub> H <sub>11</sub> Cl <sub>2</sub> N <sub>3</sub>               | 20                | UTSAM561    | 3.4 (3–3.9)                                        | 15 (13–18)                                         | 69 (55–87)                                         | >180                                               | 9.6                               | 2.2 (1.7–2.9)                                    | -4.4                        | synthesized |
| <br>C <sub>11</sub> H <sub>9</sub> Cl <sub>2</sub> N <sub>3</sub>                | 21                | UTSAM541    | 9.9 (8.9–11)                                       | 29 (27–31)                                         | 136 (115–161)                                      | >180                                               | 9.4                               | 11 (9.5–12)                                      | -2.3                        | synthesized |

| Chemical structure                                                                                                                                       | Manuscript number | Code number | <i>Tb</i> IC <sub>50</sub> pH 6.8, uM <sup>b</sup> | <i>Tb</i> IC <sub>50</sub> pH 7.2, uM <sup>c</sup> | <i>Tb</i> IC <sub>50</sub> pH 7.7, uM <sup>d</sup> | <i>Hs</i> IC <sub>50</sub> pH 7.2, uM <sup>e</sup> | pK <sub>a</sub> (N1) <sup>f</sup> | <i>Tb</i> 427 EC <sub>50</sub> , uM <sup>g</sup> | EC <sub>50</sub> Hill slope | Source      |
|----------------------------------------------------------------------------------------------------------------------------------------------------------|-------------------|-------------|----------------------------------------------------|----------------------------------------------------|----------------------------------------------------|----------------------------------------------------|-----------------------------------|--------------------------------------------------|-----------------------------|-------------|
| 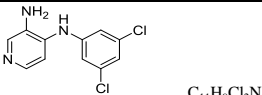<br>C <sub>11</sub> H <sub>9</sub> Cl <sub>2</sub> N <sub>3</sub>       | 22                | UTSAM562    | 135 (113–163)                                      | 21% at 180                                         | >180                                               | >180                                               | 8.4                               | 18 (14–24)                                       | -6.7                        | synthesized |
| <br>C <sub>11</sub> H <sub>9</sub> Cl <sub>2</sub> N <sub>3</sub>       | 23                | UTSAM475    | nd                                                 | >180                                               | >180                                               | >180                                               | 5.2                               | 27 (22–33)                                       | -1.9                        | synthesized |
| <br>C <sub>12</sub> H <sub>12</sub> Cl <sub>2</sub> N <sub>4</sub>      | 24                | UTSAM539    | 16% at 63                                          | >63                                                | >63                                                | >63                                                | 7.1                               | 2.7 (2.4–3.1)                                    | -3.5                        | synthesized |
| <br>C <sub>13</sub> H <sub>14</sub> Cl <sub>2</sub> N <sub>4</sub>      | 25                | UTSAM540    | >180                                               | >180                                               | >180                                               | >180                                               | 7.0                               | 14 (8.1–24)                                      | -6.3                        | synthesized |
| <br>C <sub>10</sub> H <sub>9</sub> Cl <sub>2</sub> N <sub>5</sub>       | 26                | UTSAM584    | 5.8 (4.9–6.8)                                      | 48 (43–54)                                         | 18% at 180                                         | >180                                               | 6.4                               | 14 (12–17)                                       | -2.0                        | synthesized |
| <br>C <sub>11</sub> H <sub>10</sub> BrClN <sub>4</sub>                  | 27                | UTSAM626    | 50 (34–72)                                         | 24% at 180                                         | >180                                               | >180                                               | 6.4                               | 20 (17–24)                                       | -2.7                        | synthesized |
| <br>C <sub>12</sub> H <sub>12</sub> Cl <sub>2</sub> N <sub>4</sub>      | 28                | UTSAM544    | 21 (19–23)                                         | 81 (74–89)                                         | 23% at 180                                         | >180                                               | 7.2                               | 38 (34–43)                                       | -4.0                        | synthesized |
| <br>C <sub>11</sub> H <sub>9</sub> Cl <sub>2</sub> N <sub>3</sub> S    | 29                | UTSAM536    | nd                                                 | >180                                               | >180                                               | >180                                               | 4.3                               | >25                                              | na                          | synthesized |
| <br>C <sub>12</sub> H <sub>12</sub> Cl <sub>2</sub> N <sub>4</sub>    | 30                | UTSAM579    | 31 (28–34)                                         | 139 (130–150)                                      | 17% at 180                                         | >180                                               | 8.1                               | 11 (9.9–13)                                      | -2.6                        | synthesized |
| <br>C <sub>13</sub> H <sub>14</sub> Cl <sub>2</sub> N <sub>4</sub>    | 31                | UTSAM575    | 6.6 (5.9–7.4)                                      | 28 (25–32)                                         | 45% at 180                                         | 29% at 180                                         | 8.2                               | 5.7 (1.6–21)                                     | -8.7                        | synthesized |
| <br>C <sub>11</sub> H <sub>10</sub> BrClN <sub>4</sub>                | 32                | UTSAM572    | 0.31 (0.28–0.35)                                   | 2.2 (2.0–2.4)                                      | 26 (23–30)                                         | 33% at 180                                         | 7.3                               | 4.7 (3.9–5.8)                                    | -4.2                        | synthesized |
| <br>C <sub>12</sub> H <sub>10</sub> ClN <sub>5</sub>                  | 33                | UTSAM567    | 0.46 (0.41–0.52)                                   | 3.9 (3.2–4.83)                                     | 53 (45–63)                                         | 29% at 180                                         | 7.3                               | 12 (10–14)                                       | -1.9                        | synthesized |
| <br>C <sub>12</sub> H <sub>10</sub> ClF <sub>3</sub> N <sub>4</sub>   | 34                | UTSAM564    | 0.71 (0.59–0.85)                                   | 3.9 (3.4–4.4)                                      | 42 (34–51)                                         | 39% at 180                                         | 7.3                               | 13 (11–15)                                       | -4.0                        | synthesized |
| <br>C <sub>17</sub> H <sub>15</sub> ClN <sub>4</sub>                  | 35                | UTSAM573    | 0.52 (0.46–0.58)                                   | 3.3 (2.8–3.9)                                      | 40 (34–47)                                         | 30% at 63                                          | 7.3                               | 4.5 (2.1–9.4)                                    | -6.6                        | synthesized |
| <br>C <sub>11</sub> H <sub>10</sub> ClF <sub>5</sub> N <sub>4</sub> S | 36                | UTSAM606    | 1.9 (1.7–2.1)                                      | 16 (14–18)                                         | 38% at 180                                         | >180                                               | 7.3                               | 13 (11–15)                                       | -4.5                        | synthesized |

| Chemical structure                                                                                                                                                  | Manuscript number | Code number | <i>Tb</i> IC <sub>50</sub> pH 6.8, $\mu\text{M}^b$ | <i>Tb</i> IC <sub>50</sub> pH 7.2, $\mu\text{M}^c$ | <i>Tb</i> IC <sub>50</sub> pH 7.7, $\mu\text{M}^d$ | <i>Hs</i> IC <sub>50</sub> pH 7.2, $\mu\text{M}^e$ | pK <sub>a</sub> (N1) <sup>f</sup> | <i>Tb</i> 427 EC <sub>50</sub> , $\mu\text{M}^g$ | EC <sub>50</sub> Hill slope | Source      |
|---------------------------------------------------------------------------------------------------------------------------------------------------------------------|-------------------|-------------|----------------------------------------------------|----------------------------------------------------|----------------------------------------------------|----------------------------------------------------|-----------------------------------|--------------------------------------------------|-----------------------------|-------------|
| 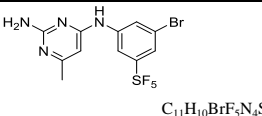<br>C <sub>11</sub> H <sub>10</sub> BrF <sub>5</sub> N <sub>4</sub> S              | 37                | UTSAM604    | 1.0 (0.93–1.1)                                     | 8.7 (7.4–10)                                       | 167 (110–253)                                      | >180                                               | 7.3                               | 0.45 (0.32–0.62)                                 | -6.3                        | synthesized |
| <br>C <sub>13</sub> H <sub>15</sub> BrN <sub>4</sub>                               | 38                | UTSAM628    | 1.2 (0.96–1.5)                                     | 7.6 (5.7–10)                                       | 80 (60–106)                                        | >180                                               | 7.3                               | 5.5 (4.6–6.6)                                    | -3.8                        | synthesized |
| <br>C <sub>13</sub> H <sub>15</sub> BrN <sub>4</sub> O                             | 39                | UTSAM633    | 1.0 (0.61–1.7)                                     | 6 (5.2–6.9)                                        | 57 (49–65)                                         | 36% at 180                                         | 7.3                               | 4.4 (4.2–4.7)                                    | =-8.0                       | synthesized |
| <br>C <sub>13</sub> H <sub>12</sub> BrF <sub>3</sub> N <sub>4</sub> O              | 40                | UTSAM627    | 0.23 (0.17–0.32)                                   | 1.6 (1.1–2.4)                                      | 13 (8–23)                                          | 44 (33–58)                                         | 7.3                               | 4.2 (3.6–4.8)                                    | -3.8                        | synthesized |
| <br>C <sub>14</sub> H <sub>15</sub> BrN <sub>4</sub> O                             | 41                | UTSAM634    | 0.64 (0.43–0.96)                                   | 4.5 (4.1–4.9)                                      | 52 (45–60)                                         | 28% at 180                                         | 7.3                               | 4.4 (3.7–5.3)                                    | -3.9                        | synthesized |
| <br>C <sub>15</sub> H <sub>19</sub> BrN <sub>4</sub> O                             | 42                | UTSAM635    | 0.74 (0.56–0.98)                                   | 4.5 (4.0–5.1)                                      | 56 (45–70)                                         | >180                                               | 7.3                               | 1.9 (1.7–2.1)                                    | -4.1                        | synthesized |
| <br>C <sub>15</sub> H <sub>19</sub> BrN <sub>4</sub> O                            | 43                | UTSAM636    | 1.9 (1.2–2.8)                                      | 11 (9.5–12)                                        | 153 (124–187)                                      | >180                                               | 7.3                               | 4.4 (3.5–5.5)                                    | -4.4                        | synthesized |
| <br>C <sub>11</sub> H <sub>10</sub> Br <sub>2</sub> N <sub>4</sub>               | 44                | UTSAM568    | 0.21 (0.18–0.23)                                   | 1.9 (1.7–2.1)                                      | 20 (18–22)                                         | 31% at 180                                         | 7.3                               | 4.8 (4.1–5.6)                                    | -4.8                        | synthesized |
| <br>C <sub>13</sub> H <sub>16</sub> N <sub>4</sub> O <sub>4</sub> S <sub>2</sub> | 45                | UTSAM602    | 0.20 (0.18–0.24)                                   | 1.5 (1.3–1.7)                                      | 15 (13–18)                                         | 39% at 180                                         | 7.3                               | >100                                             | na                          | synthesized |
| <br>C <sub>13</sub> H <sub>10</sub> F <sub>6</sub> N <sub>4</sub>                | 46                | UTSAM547    | 1.4 (1.1–1.6)                                      | 11 (9.8–12)                                        | 143 (116–176)                                      | >180                                               | 7.3                               | 14 (11–17)                                       | -4.0                        | synthesized |
| <br>C <sub>13</sub> H <sub>16</sub> N <sub>4</sub> O <sub>2</sub>                | 47                | UTSAM474    | 3.4 (2.7–4.2)                                      | 17 (14–20)                                         | 131 (110–56)                                       | 21% at 180                                         | 7.3                               | 41 (33–51)                                       | -1.7                        | synthesized |
| <br>C <sub>13</sub> H <sub>12</sub> N <sub>4</sub> O <sub>4</sub>                | 48                | UTSAM565    | >180                                               | >180                                               | >180                                               | >180                                               | 7.3                               | >100                                             | na                          | synthesized |
| <br>C <sub>15</sub> H <sub>16</sub> N <sub>4</sub> O <sub>4</sub>                | 49                | UTSAM566    | 38 (32–44)                                         | 40% at 180                                         | >180                                               | >180                                               | 7.3                               | 42 (22–78)                                       | -5.7                        | synthesized |

| Chemical structure                                                                                                                                                 | Manuscript number | Code number | <i>Tb</i> IC <sub>50</sub> pH 6.8, uM <sup>b</sup> | <i>Tb</i> IC <sub>50</sub> pH 7.2, uM <sup>c</sup> | <i>Tb</i> IC <sub>50</sub> pH 7.7, uM <sup>d</sup> | <i>Hs</i> IC <sub>50</sub> pH 7.2, uM <sup>e</sup> | pK <sub>a</sub> (N1) <sup>f</sup> | <i>Tb</i> 427 EC <sub>50</sub> , uM <sup>g</sup> | EC <sub>50</sub> Hill slope | Source      |
|--------------------------------------------------------------------------------------------------------------------------------------------------------------------|-------------------|-------------|----------------------------------------------------|----------------------------------------------------|----------------------------------------------------|----------------------------------------------------|-----------------------------------|--------------------------------------------------|-----------------------------|-------------|
| 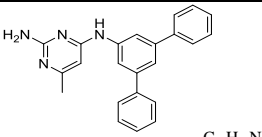<br>C <sub>23</sub> H <sub>20</sub> N <sub>4</sub>                                | 50                | UTSAM570    | 109 (90–132)                                       | >180                                               | >180                                               | >180                                               | 7.3                               | 1.5 (1.3–1.6)                                    | =-8.0                       | synthesized |
| <br>C <sub>25</sub> H <sub>18</sub> Cl <sub>4</sub> N <sub>6</sub> O <sub>2</sub> | 51                | UTSAM591    | 12% at 180                                         | >180                                               | >180                                               | >180                                               | 7.3                               | 2.0 (1.2–3.7)                                    | =-8.0                       | synthesized |
| <br>C <sub>13</sub> H <sub>16</sub> N <sub>4</sub>                                | 52                | UTSAM546    | 35 (32–38)                                         | 141 (119–167)                                      | >180                                               | >180                                               | 7.3                               | 19 (17–22)                                       | -1.8                        | synthesized |
| <br>C <sub>19</sub> H <sub>28</sub> N <sub>4</sub>                                | 53                | UTSAM593    | 42 (36–49)                                         | >63                                                | >63                                                | >63                                                | 7.3                               | 4.1 (4.1–4.5)                                    | =-8.0                       | synthesized |
| <br>C <sub>11</sub> H <sub>11</sub> F <sub>5</sub> N <sub>4</sub> S               | 54                | UTSAM597    | 84 (72–99)                                         | 23% at 180                                         | >180                                               | >180                                               | 7.3                               | 14 (11–17)                                       | -4.1                        | synthesized |
| <br>C <sub>11</sub> H <sub>11</sub> ClN <sub>4</sub>                             | 55                | UTSAM543    | 75 (69–83)                                         | 35% at 180                                         | >180                                               | >180                                               | 7.3                               | 42 (34–52)                                       | -1.7                        | synthesized |
| <br>C <sub>11</sub> H <sub>11</sub> BrN <sub>4</sub>                            | 56                | UTSAM490    | nd                                                 | 41% at 180                                         | >180                                               | >180                                               | 7.3                               | 22 (19–26)                                       | -1.7                        | ChemBridge  |
| <br>C <sub>11</sub> H <sub>11</sub> FN <sub>4</sub>                             | 57                | UTSAM492    | nd                                                 | >180                                               | >180                                               | >180                                               | 7.3                               | >25                                              | na                          | ChemBridge  |
| <br>C <sub>12</sub> H <sub>14</sub> N <sub>4</sub> S                            | 58                | UTSAM488    | nd                                                 | 149 (122–181)                                      | >180                                               | 23% at 180                                         | 7.3                               | >25                                              | na                          | ChemBridge  |
| <br>C <sub>11</sub> H <sub>12</sub> N <sub>4</sub>                              | 59                | UTSAM477    | nd                                                 | >180                                               | >180                                               | >180                                               | 7.3                               | >25                                              | na                          | ChemBridge  |
| <br>C <sub>11</sub> H <sub>10</sub> F <sub>2</sub> N <sub>4</sub>               | 60                | UTSAM538    | 38 (35–41)                                         | 180 (160–201)                                      | >180                                               | >180                                               | 7.3                               | 70 (61–80)                                       | -1.6                        | synthesized |
| <br>C <sub>11</sub> H <sub>10</sub> ClFN <sub>4</sub>                           | 61                | UTSAM560    | 3.3 (2.8–3.9)                                      | 32 (13–82)                                         | 41% at 180                                         | >180                                               | 7.3                               | 17 (15–20)                                       | -2.4                        | synthesized |
| <br>C <sub>11</sub> H <sub>8</sub> Cl <sub>2</sub> FN <sub>4</sub>              | 62                | UTSAM559    | 0.18 (0.15–0.23)                                   | 1.5 (1.4–1.8)                                      | 19 (16–22)                                         | 160 (135–191)                                      | 7.3                               | 4.8 (3.3–7.0)                                    | -5.9                        | synthesized |
| <br>C <sub>11</sub> H <sub>8</sub> Br <sub>2</sub> FN <sub>4</sub>              | 63                | UTSAM589    | 0.21 (0.20–0.23)                                   | 1.6 (1.3–1.8)                                      | 16 (13–18)                                         | 43% at 180                                         | 7.3                               | 4.6 (3.6–5.9)                                    | -4.5                        | synthesized |

| Chemical structure                                                                                                                                                   | Manuscript number | Code number | <i>Tb</i> IC <sub>50</sub> pH 6.8, uM <sup>b</sup> | <i>Tb</i> IC <sub>50</sub> pH 7.2, uM <sup>c</sup> | <i>Tb</i> IC <sub>50</sub> pH 7.7, uM <sup>d</sup> | <i>Hs</i> IC <sub>50</sub> pH 7.2, uM <sup>e</sup> | pK <sub>a</sub> (N1) <sup>f</sup> | <i>Tb</i> 427 EC <sub>50</sub> , uM <sup>g</sup> | EC <sub>50</sub> Hill slope | Source      |
|----------------------------------------------------------------------------------------------------------------------------------------------------------------------|-------------------|-------------|----------------------------------------------------|----------------------------------------------------|----------------------------------------------------|----------------------------------------------------|-----------------------------------|--------------------------------------------------|-----------------------------|-------------|
| 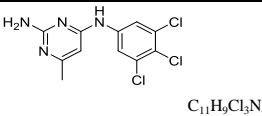<br>C <sub>11</sub> H <sub>9</sub> Cl <sub>2</sub> N <sub>4</sub>                   | 64                | UTSAM563    | 1.1 (0.94–1.3)                                     | 11 (8.8–13)                                        | 31% at 63                                          | >63                                                | 7.3                               | 4.5 (3.4–5.9)                                    | -5.2                        | synthesized |
| <br>C <sub>12</sub> H <sub>12</sub> Cl <sub>2</sub> N <sub>4</sub>                  | 65                | UTSAM590    | 3.4 (2.9–3.9)                                      | 20 (17–24)                                         | 14% at 63                                          | >63                                                | 7.3                               | 4.4 (4.2–4.8)                                    | =-8.0                       | synthesized |
| <br>C <sub>17</sub> H <sub>14</sub> Cl <sub>2</sub> N <sub>4</sub> O                | 66                | UTSAM603    | 25 (21–31)                                         | 38% at 180                                         | >180                                               | >180                                               | 7.3                               | 1.1 (0.97–1.3)                                   | -1.4                        | synthesized |
| <br>C <sub>11</sub> H <sub>10</sub> Cl <sub>2</sub> N <sub>4</sub> O                | 67                | UTSAM586    | 35 (30–41)                                         | 33% at 180                                         | >180                                               | >180                                               | 7.0                               | 13 (10–16)                                       | -1.1                        | synthesized |
| <br>C <sub>12</sub> H <sub>10</sub> Cl <sub>2</sub> F <sub>2</sub> N <sub>4</sub> O | 68                | UTSAM594    | 42% at 63                                          | >63                                                | >63                                                | >63                                                | 7.3                               | 4.5 (3.7–5.4)                                    | -3.8                        | synthesized |
| <br>C <sub>13</sub> H <sub>15</sub> Cl <sub>2</sub> N <sub>5</sub>                  | 69                | UTSAM625    | 85 (71–104)                                        | >180                                               | >180                                               | >180                                               | 7.3                               | 5.8 (4.2–7.9)                                    | =-8.0                       | synthesized |
| <br>C <sub>15</sub> H <sub>17</sub> Cl <sub>2</sub> N <sub>5</sub> O               | 70                | UTSAM620    | >180                                               | >180                                               | >180                                               | >180                                               | 7.3                               | 18 (14–24)                                       | -7.4                        | synthesized |
| <br>C <sub>16</sub> H <sub>19</sub> Cl <sub>2</sub> N <sub>5</sub>                | 71                | UTSAM623    | 226 (160–319)                                      | >180                                               | >180                                               | >180                                               | 7.3                               | 2.1 (1.3–3.2)                                    | =-8.0                       | synthesized |
| <br>C <sub>11</sub> H <sub>10</sub> Cl <sub>2</sub> N <sub>4</sub> O              | 72                | UTSAM577    | 4.2 (3.6–4.9)                                      | 37 (29–46)                                         | 23% at 180                                         | >180                                               | 7.1                               | 26% at 100                                       | na                          | synthesized |
| <br>C <sub>11</sub> H <sub>8</sub> Cl <sub>2</sub> F <sub>2</sub> N <sub>4</sub>  | 73                | UTSAM617    | 0.33 (0.25–0.43)                                   | 2.2 (2.0–2.6)                                      | 21 (18–23)                                         | >63                                                | 7.2                               | 10 (8.5–12)                                      | -2.3                        | synthesized |
| <br>C <sub>11</sub> H <sub>10</sub> Cl <sub>2</sub> N <sub>4</sub>                | 74                | UTSAM501    | nd                                                 | 115 (89–150)                                       | >180                                               | >180                                               | 7.2                               | 23% at 25                                        | na                          | ChemBridge  |
| <br>C <sub>11</sub> H <sub>10</sub> Cl <sub>2</sub> N <sub>4</sub>                | 75                | UTSAM500    | nd                                                 | 137 (95–198)                                       | >180                                               | >180                                               | 7.3                               | 27% at 25                                        | na                          | ChemBridge  |
| <br>C <sub>11</sub> H <sub>10</sub> Cl <sub>2</sub> N <sub>4</sub>                | 76                | UTSAM502    | nd                                                 | >180                                               | >180                                               | >180                                               | 7.3                               | 28% at 25                                        | na                          | ChemBridge  |
| <br>C <sub>12</sub> H <sub>14</sub> N <sub>4</sub>                                | 77                | UTSAM478    | nd                                                 | >180                                               | >180                                               | >180                                               | 7.3                               | >25                                              | na                          | ChemBridge  |

| Chemical structure                                                                                                                                    | Manuscript number | Code number | <i>Tb</i> IC <sub>50</sub> pH 6.8, uM <sup>b</sup> | <i>Tb</i> IC <sub>50</sub> pH 7.2, uM <sup>c</sup> | <i>Tb</i> IC <sub>50</sub> pH 7.7, uM <sup>d</sup> | <i>Hs</i> IC <sub>50</sub> pH 7.2, uM <sup>e</sup> | pK <sub>a</sub> (N1) <sup>f</sup> | <i>Tb</i> 427 EC <sub>50</sub> , uM <sup>g</sup> | EC <sub>50</sub> Hill slope | Source      |
|-------------------------------------------------------------------------------------------------------------------------------------------------------|-------------------|-------------|----------------------------------------------------|----------------------------------------------------|----------------------------------------------------|----------------------------------------------------|-----------------------------------|--------------------------------------------------|-----------------------------|-------------|
| 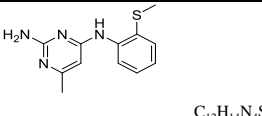<br>C <sub>12</sub> H <sub>14</sub> N <sub>4</sub> S                 | 78                | UTSAM487    | nd                                                 | >180                                               | >180                                               | >180                                               | 7.3                               | >25                                              | na                          | ChemBridge  |
| <br>C <sub>11</sub> H <sub>11</sub> BrN <sub>4</sub>                 | 79                | UTSAM491    | nd                                                 | >180                                               | >180                                               | >180                                               | 7.3                               | >25                                              | na                          | ChemBridge  |
| <br>C <sub>12</sub> H <sub>13</sub> ClN <sub>4</sub>                 | 80                | UTSAM496    | nd                                                 | >180                                               | >180                                               | >180                                               | 7.3                               | 29% at 25                                        | na                          | ChemBridge  |
| <br>C <sub>12</sub> H <sub>13</sub> ClN <sub>4</sub>                 | 81                | UTSAM494    | nd                                                 | >180                                               | >180                                               | >180                                               | 7.3                               | 28% at 25                                        | na                          | ChemBridge  |
| <br>C <sub>12</sub> H <sub>13</sub> Cl <sub>2</sub> N <sub>4</sub>   | 82                | UTSAM495    | nd                                                 | >180                                               | >180                                               | >180                                               | 7.3                               | >25                                              | na                          | ChemBridge  |
| <br>C <sub>11</sub> H <sub>10</sub> BrFN <sub>4</sub>                | 83                | UTSAM497    | nd                                                 | >180                                               | >180                                               | >180                                               | 7.2                               | 25% at 25                                        | na                          | ChemBridge  |
| <br>C <sub>12</sub> H <sub>10</sub> ClF <sub>3</sub> N <sub>4</sub> | 84                | UTSAM499    | nd                                                 | 199 (164–240)                                      | >180                                               | >180                                               | 7.3                               | 28% at 25                                        | na                          | ChemBridge  |
| <br>C <sub>11</sub> H <sub>11</sub> ClN <sub>4</sub>               | 85                | UTSAM489    | nd                                                 | >180                                               | >180                                               | >180                                               | 7.3                               | 28% at 25                                        | na                          | ChemBridge  |
| <br>C <sub>13</sub> H <sub>16</sub> N <sub>4</sub>                 | 86                | UTSAM480    | nd                                                 | >180                                               | >180                                               | >180                                               | 7.3                               | 19 (17–22)                                       | -3.5                        | ChemBridge  |
| <br>C <sub>14</sub> H <sub>18</sub> N <sub>4</sub>                 | 87                | UTSAM481    | nd                                                 | >180                                               | >180                                               | >180                                               | 7.3                               | 11 (8.5–15)                                      | -5.0                        | ChemBridge  |
| <br>C <sub>12</sub> H <sub>11</sub> F <sub>3</sub> N <sub>4</sub>  | 88                | UTSAM493    | nd                                                 | >180                                               | >180                                               | >180                                               | 7.3                               | 15 (13–17)                                       | -3.1                        | ChemBridge  |
| <br>C <sub>17</sub> H <sub>14</sub> Cl <sub>2</sub> N <sub>4</sub> | 89                | UTSAM592    | 42% at 180                                         | >180                                               | >180                                               | >180                                               | 7.3                               | 1.0 (0.88–1.2)                                   | -2.9                        | synthesized |
| <br>C <sub>11</sub> H <sub>10</sub> F <sub>2</sub> N <sub>4</sub>  | 90                | UTSAM498    | nd                                                 | 33% at 180                                         | >180                                               | >180                                               | 7.3                               | 25% at 25                                        | na                          | ChemBridge  |
| <br>C <sub>17</sub> H <sub>14</sub> ClFN <sub>4</sub>              | 91                | UTSAM610    | 0.14 (0.12–0.15)                                   | 1.1 (0.95–1.2)                                     | 13 (7.5–21)                                        | >21                                                | 7.3                               | 1.6 (0.94–2.8)                                   | -6.8                        | synthesized |

| Chemical structure                                                                                                                                    | Manuscript number | Code number | <i>Tb</i> IC <sub>50</sub> pH 6.8, uM <sup>b</sup> | <i>Tb</i> IC <sub>50</sub> pH 7.2, uM <sup>c</sup> | <i>Tb</i> IC <sub>50</sub> pH 7.7, uM <sup>d</sup> | <i>Hs</i> IC <sub>50</sub> pH 7.2, uM <sup>e</sup> | pK <sub>a</sub> (N1) <sup>f</sup> | <i>Tb</i> 427 EC <sub>50</sub> , uM <sup>g</sup> | EC <sub>50</sub> Hill slope | Source      |
|-------------------------------------------------------------------------------------------------------------------------------------------------------|-------------------|-------------|----------------------------------------------------|----------------------------------------------------|----------------------------------------------------|----------------------------------------------------|-----------------------------------|--------------------------------------------------|-----------------------------|-------------|
| 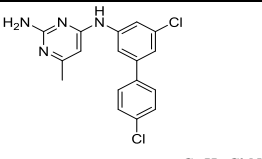<br>C <sub>17</sub> H <sub>14</sub> Cl <sub>2</sub> N <sub>4</sub>   | 92                | UTSAM582    | 0.25 (0.22–0.28)                                   | 1.7 (1.6–2.0)                                      | 25 (20–30)                                         | >63                                                | 7.3                               | 2.2 (1.8–2.7)                                    | -4.5                        | synthesized |
| <br>C <sub>18</sub> H <sub>17</sub> ClN <sub>4</sub> O               | 93                | UTSAM581    | 0.33 (0.29–0.37)                                   | 2.3 (2.1–2.6)                                      | 32 (26–40)                                         | >180                                               | 7.3                               | 4.5 (3.1–6.6)                                    | -5.5                        | synthesized |
| <br>C <sub>18</sub> H <sub>17</sub> ClN <sub>4</sub>                 | 94                | UTSAM583    | 0.58 (0.51–0.65)                                   | 4.6 (4.0–5.3)                                      | 66 (50–87)                                         | >63                                                | 7.3                               | 4.3 (3.3–5.7)                                    | -5.1                        | synthesized |
| <br>C <sub>18</sub> H <sub>14</sub> ClF <sub>3</sub> N <sub>4</sub>  | 95                | UTSAM585    | 0.72 (0.63–0.84)                                   | 4.7 (3.9–5.7)                                      | 28% at 21                                          | >21                                                | 7.3                               | 2.0 (1.4–3.0)                                    | -6.3                        | synthesized |
| <br>C <sub>18</sub> H <sub>14</sub> ClN <sub>5</sub>                | 96                | UTSAM612    | 0.84 (0.67–1.1)                                    | 7.6 (3.2–18)                                       | >6.8                                               | >6.8                                               | 7.3                               | 1.0 (0.96–1.1)                                   | -3.7                        | synthesized |
| <br>C <sub>19</sub> H <sub>17</sub> ClN <sub>4</sub> O             | 97                | UTSAM608    | 5.7 (4.8–6.8)                                      | 28% at 21                                          | >21                                                | >21                                                | 7.3                               | 6.7 (4.1–11)                                     | =-8.0                       | synthesized |
| <br>C <sub>17</sub> H <sub>15</sub> ClN <sub>4</sub> O             | 98                | UTSAM588    | 20 (16–25)                                         | 143 (115–178)                                      | >180                                               | >180                                               | 7.3                               | 9.7 (7.5–13)                                     | -2.1                        | synthesized |
| <br>C <sub>23</sub> H <sub>19</sub> ClN <sub>4</sub>               | 99                | UTSAM609    | 14 (12–15)                                         | 167 (150–190)                                      | >180                                               | >180                                               | 7.3                               | 0.91 (0.82–1.0)                                  | -3.1                        | synthesized |
| <br>C <sub>19</sub> H <sub>20</sub> ClN <sub>5</sub>               | 100               | UTSAM614    | 26 (20–34)                                         | 34% at 180                                         | >180                                               | >180                                               | 7.3                               | 5.0 (4.2–6.0)                                    | -4.6                        | synthesized |
| <br>C <sub>17</sub> H <sub>14</sub> Cl <sub>2</sub> N <sub>4</sub> | 101               | UTSAM618    | 2.9 (2.0–4.1)                                      | 26 (22–33)                                         | >180                                               | >180                                               | 7.3                               | 8.5 (7.6–9.5)                                    | -2.3                        | synthesized |



| Chemical structure                                                                                                                                                 | Manuscript number | Code number | <i>Tb</i> IC <sub>50</sub> pH 6.8, uM <sup>b</sup> | <i>Tb</i> IC <sub>50</sub> pH 7.2, uM <sup>c</sup> | <i>Tb</i> IC <sub>50</sub> pH 7.7, uM <sup>d</sup> | <i>Hs</i> IC <sub>50</sub> pH 7.2, uM <sup>e</sup> | pK <sub>a</sub> (N1) <sup>f</sup> | <i>Tb</i> 427 EC <sub>50</sub> , uM <sup>g</sup> | EC <sub>50</sub> Hill slope | Source      |
|--------------------------------------------------------------------------------------------------------------------------------------------------------------------|-------------------|-------------|----------------------------------------------------|----------------------------------------------------|----------------------------------------------------|----------------------------------------------------|-----------------------------------|--------------------------------------------------|-----------------------------|-------------|
| 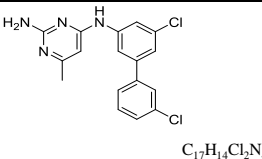<br>C <sub>17</sub> H <sub>14</sub> Cl <sub>2</sub> N <sub>4</sub>                | 102               | UTSAM616    | 9.2 (7.6–11)                                       | 81 (57–114)                                        | >180                                               | >180                                               | 7.3                               | 1.9 (1.6–2.3)                                    | -5.3                        | synthesized |
| <br>C <sub>17</sub> H <sub>13</sub> Cl <sub>3</sub> N <sub>4</sub>                | 103               | UTSAM587    | 6.9 (6.1–8.0)                                      | 102 (82–125)                                       | >180                                               | >180                                               | 7.3                               | 2.9 (1.3–3.6)                                    | =-8.0                       | synthesized |
| <br>C <sub>17</sub> H <sub>13</sub> Cl <sub>2</sub> FN <sub>4</sub>               | 104               | UTSAM615    | 14 (11–18)                                         | 157 (95–260)                                       | >180                                               | >180                                               | 7.3                               | 3.2 (2.8–3.7)                                    | -3.0                        | synthesized |
| <br>C <sub>18</sub> H <sub>13</sub> Cl <sub>2</sub> F <sub>3</sub> N <sub>4</sub> | 105               | UTSAM607    | 6.6 (5.8–7.4)                                      | 53 (46–61)                                         | 16% at 180                                         | >180                                               | 7.3                               | 1.5 (1.0–2.2)                                    | -5.8                        | synthesized |
| <br>C <sub>19</sub> H <sub>13</sub> ClF <sub>6</sub> N <sub>4</sub>              | 106               | UTSAM611    | 2.7 (2.5–2.9)                                      | 28 (25–31)                                         | 13% at 180                                         | >180                                               | 7.3                               | 0.53 (0.47–0.59)                                 | -4.6                        | synthesized |
| <br>C <sub>21</sub> H <sub>17</sub> ClN <sub>4</sub>                            | 107               | UTSAM605    | 5.7 (5.1–6.3)                                      | 57 (51–64)                                         | >180                                               | >180                                               | 7.3                               | 1.7 (1.4–2.0)                                    | =-8.0                       | synthesized |
| <br>C <sub>25</sub> H <sub>19</sub> ClN <sub>4</sub>                            | 108               | UTSAM613    | 198 (129–304)                                      | >180                                               | >180                                               | >180                                               | 7.3                               | 1.8 (1.5–2.1)                                    | -5.1                        | synthesized |
| <br>C <sub>18</sub> H <sub>15</sub> ClN <sub>4</sub> O <sub>2</sub>             | 109               | UTSAM624    | 0.86 (0.61–1.2)                                    | 6.2 (4.6–8.3)                                      | 19% at 21                                          | >21                                                | 7.3                               | 2.3 (1.6–3.2)                                    | =-8.0                       | synthesized |
| <br>C <sub>17</sub> H <sub>13</sub> ClN <sub>6</sub> O                          | 110               | UTSAM598    | 0.96 (0.66–1.4)                                    | 27 (21–35)                                         | 27% at 180                                         | >180                                               | 7.3                               | 0.57 (0.13–2.5)                                  | -8.4                        | synthesized |
| <br>C <sub>15</sub> H <sub>13</sub> ClN <sub>4</sub> O                          | 111               | UTSAM596    | 1.2 (1.0–1.4)                                      | 7.4 (6.2–8.7)                                      | 85 (72–100)                                        | 30% at 180                                         | 7.3                               | 7.1 (5.7–8.8)                                    | -5.1                        | synthesized |

| Chemical structure                                                                                                                      | Manuscript number | Code number | <i>Tb</i> IC <sub>50</sub> pH 6.8, uM <sup>b</sup> | <i>Tb</i> IC <sub>50</sub> pH 7.2, uM <sup>c</sup> | <i>Tb</i> IC <sub>50</sub> pH 7.7, uM <sup>d</sup> | <i>Hs</i> IC <sub>50</sub> pH 7.2, uM <sup>e</sup> | pK <sub>a</sub> (N1) <sup>f</sup> | <i>Tb</i> 427 EC <sub>50</sub> , uM <sup>g</sup> | EC <sub>50</sub> Hill slope | Source      |
|-----------------------------------------------------------------------------------------------------------------------------------------|-------------------|-------------|----------------------------------------------------|----------------------------------------------------|----------------------------------------------------|----------------------------------------------------|-----------------------------------|--------------------------------------------------|-----------------------------|-------------|
| 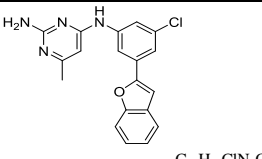<br>C <sub>19</sub> H <sub>15</sub> ClN <sub>4</sub> O | 112               | UTSAM599    | 14 (11–18)                                         | 23% at 63                                          | >63                                                | >63                                                | 7.3                               | 1.4 (1.4–1.5)                                    | =-8.0                       | synthesized |
| <br>C <sub>15</sub> H <sub>13</sub> ClN <sub>4</sub> S | 113               | UTSAM600    | 3.9 (3.2–4.8)                                      | 26 (22–32)                                         | 34% at 180                                         | 30% at 180                                         | 7.3                               | 29 (23–35)                                       | -4.5                        | synthesized |
| <br>C <sub>19</sub> H <sub>15</sub> ClN <sub>4</sub> S | 114               | UTSAM601    | 4.9 (4.4–5.6)                                      | 41 (36–46)                                         | 14% at 180                                         | >180                                               | 7.3                               | 1.6 (1.5–1.8)                                    | =-8.0                       | synthesized |
| <br>C <sub>14</sub> H <sub>12</sub> ClN <sub>5</sub> S | 115               | UTSAM595    | 4.6 (3.8–5.6)                                      | 42% at 21                                          | >21                                                | >21                                                | 7.3                               | 3.6 (3.1–4.1)                                    | -3.2                        | synthesized |
| <br>C <sub>15</sub> H <sub>13</sub> ClN <sub>6</sub>  | 116               | UTSAM622    | 24 (18–34)                                         | 164 (132–203)                                      | >180                                               | >180                                               | 7.3                               | 6.7 (4.7–9.6)                                    | =-8.0                       | synthesized |
| <br>C <sub>15</sub> H <sub>13</sub> ClN <sub>6</sub> | 117               | UTSAM621    | 36% at 180                                         | >180                                               | >180                                               | >180                                               | 7.3                               | 58 (33–100)                                      | =-8.0                       | synthesized |
| <br>C <sub>19</sub> H <sub>19</sub> FN <sub>4</sub>  | 118               | UTSAM629    | 0.36 (0.26–0.49)                                   | 2.7 (2.2–3.4)                                      | 22 (18–27)                                         | >180                                               | 7.3                               | 1.3 (1.1–1.5)                                    | -2.5                        | synthesized |
| <br>C <sub>15</sub> H <sub>14</sub> N <sub>4</sub>   | na                | UTSAM476    | nd                                                 | >180                                               | >180                                               | >180                                               | 7.3                               | 27% at 25                                        | na                          | ChemBridge  |
| <br>C <sub>13</sub> H <sub>16</sub> N <sub>4</sub>   | na                | UTSAM479    | nd                                                 | >180                                               | >180                                               | >180                                               | 7.3                               | >25                                              | na                          | ChemBridge  |
| <br>C <sub>13</sub> H <sub>16</sub> N <sub>4</sub>   | na                | UTSAM482    | nd                                                 | >180                                               | >180                                               | >180                                               | 7.3                               | >25                                              | na                          | ChemBridge  |
| <br>C <sub>13</sub> H <sub>16</sub> N <sub>4</sub>   | na                | UTSAM483    | nd                                                 | >180                                               | >180                                               | >180                                               | 7.3                               | >25                                              | na                          | ChemBridge  |
| <br>C <sub>13</sub> H <sub>16</sub> N <sub>4</sub>   | na                | UTSAM484    | nd                                                 | >180                                               | >180                                               | >180                                               | 7.3                               | >25                                              | na                          | ChemBridge  |

| Chemical structure                                                                                                                                  | Manuscript number | Code number | <i>Tb</i> IC <sub>50</sub> pH 6.8, uM <sup>b</sup> | <i>Tb</i> IC <sub>50</sub> pH 7.2, uM <sup>c</sup> | <i>Tb</i> IC <sub>50</sub> pH 7.7, uM <sup>d</sup> | <i>Hs</i> IC <sub>50</sub> pH 7.2, uM <sup>e</sup> | pK <sub>a</sub> (N1) <sup>f</sup> | <i>Tb</i> 427 EC <sub>50</sub> , uM <sup>a</sup> | EC <sub>50</sub> Hill slope | Source      |
|-----------------------------------------------------------------------------------------------------------------------------------------------------|-------------------|-------------|----------------------------------------------------|----------------------------------------------------|----------------------------------------------------|----------------------------------------------------|-----------------------------------|--------------------------------------------------|-----------------------------|-------------|
| 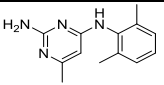<br>C <sub>13</sub> H <sub>16</sub> N <sub>4</sub>                 | na                | UTSAM485    | nd                                                 | >180                                               | >180                                               | >180                                               | 7.3                               | >25                                              | na                          | ChemBridge  |
| <br>C <sub>11</sub> H <sub>10</sub> F <sub>2</sub> N <sub>4</sub>  | na                | UTSAM503    | nd                                                 | >180                                               | >180                                               | >180                                               | 7.1                               | >25                                              | na                          | ChemBridge  |
| <br>C <sub>14</sub> H <sub>18</sub> N <sub>4</sub>                 | na                | UTSAM504    | nd                                                 | >180                                               | >180                                               | >180                                               | 7.3                               | >25                                              | na                          | ChemBridge  |
| <br>C <sub>14</sub> H <sub>16</sub> Cl <sub>2</sub> N <sub>4</sub> | na                | UTSAM545    | >180                                               | >180                                               | >180                                               | >180                                               | 6.9                               | 41 (33–50)                                       | -4.4                        | synthesized |
| <br>C <sub>9</sub> H <sub>14</sub> N <sub>4</sub> O                | na                | UTSAM548    | 28% at 180                                         | >180                                               | >180                                               | >180                                               | 8.0                               | >100                                             | na                          | synthesized |
| <br>C <sub>11</sub> H <sub>18</sub> N <sub>4</sub>                 | na                | UTSAM549    | >180                                               | >180                                               | >180                                               | >180                                               | 8.1                               | 36% at 100                                       | na                          | synthesized |
| <br>C <sub>10</sub> H <sub>17</sub> N <sub>5</sub>                 | na                | UTSAM550    | >180                                               | >180                                               | >180                                               | >180                                               | 8.1                               | >100                                             | na                          | synthesized |
| <br>C <sub>10</sub> H <sub>16</sub> N <sub>4</sub>                | na                | UTSAM551    | 28% at 180                                         | >180                                               | >180                                               | >180                                               | 8.0                               | 24% at 100                                       | na                          | synthesized |
| <br>C <sub>13</sub> H <sub>14</sub> N <sub>4</sub>               | na                | UTSAM552    | 142 (123–163)                                      | >180                                               | >180                                               | >180                                               | 7.2                               | >100                                             | na                          | synthesized |
| <br>C <sub>6</sub> H <sub>10</sub> N <sub>4</sub>                | na                | UTSAM553    | >180                                               | >180                                               | >180                                               | >180                                               | 8.2                               | >100                                             | na                          | synthesized |
| <br>C <sub>7</sub> H <sub>12</sub> N <sub>4</sub>                | na                | UTSAM554    | >180                                               | >180                                               | >180                                               | >180                                               | 8.1                               | >100                                             | na                          | synthesized |
| <br>C <sub>9</sub> H <sub>14</sub> N <sub>4</sub>                | na                | UTSAM555    | 25% at 180                                         | >180                                               | >180                                               | >180                                               | 8.0                               | >100                                             | na                          | synthesized |
| <br>C <sub>10</sub> H <sub>11</sub> N <sub>5</sub>               | na                | UTSAM557    | 54 (45–64)                                         | 35% at 180                                         | >180                                               | >180                                               | 7.3                               | >100                                             | na                          | synthesized |
| <br>C <sub>11</sub> H <sub>7</sub> F <sub>5</sub> N <sub>4</sub> | na                | UTSAM619    | 60 (46–80)                                         | 23% at 180                                         | >180                                               | >180                                               | 7.1                               | >100                                             | na                          | synthesized |

<sup>a</sup> Mean EC<sub>50</sub> as measured in the ATP–bioluminescence *T. brucei* viability assay, in triplicate, with 95 % confidence interval (CI) shown in parentheses. <sup>b,c,d</sup> Mean IC<sub>50</sub> for *T. brucei* AdoMetDC/prozyme at pH 6.8 (<sup>b</sup>), 7.2 (<sup>c</sup>), and 7.7 (<sup>d</sup>) determined using the RapidFire–MS-based enzyme activity assay, in triplicate, with 95 % CI shown in parentheses. <sup>e</sup> Mean IC<sub>50</sub> for human AdoMetDC at pH 7.2 determined using the RapidFire–MS-based enzyme activity assay, in triplicate, with 95 % CI shown in parentheses. Percent inhibition at the maximal tested concentration (in μM) is shown when maximum mean inhibition was <50%. <sup>f</sup> The pK<sub>a</sub> value of the conjugated acid of the pyrimidine nitrogen N1 estimated using *MarvinSketch*. na, not applicable; nd, not determined.

**Table S2. Crystallographic diffraction data and refinement statistics for the 44-bound *T. brucei* AdoMetDC/prozyme crystal structure**

| <b>Data collection</b>                                       |                                        |
|--------------------------------------------------------------|----------------------------------------|
| Symmetry                                                     | P2 <sub>1</sub> (No. 4)                |
| Unit cell dimensions (Å; °)                                  | a=81.09, b=96.25, c=98.84;<br>β=102.43 |
| Wavelength (Å)                                               | 0.9191                                 |
| Average mosaicity (°)                                        | 1.09                                   |
| Resolution range (Å)                                         | 50–3.00 (3.05–3.00) <sup>a</sup>       |
| Unique number of reflections before merging Friedel pairs    | 50,684                                 |
| Unique number of reflections                                 | 30,294                                 |
| Average redundancy                                           | 6.8 (6.3)                              |
| Completeness (%)                                             | 99.8 (99.1)                            |
| $R_{r.i.m.}$ (%) <sup>b</sup>                                | 19.4                                   |
| $R_{p.i.m.}$ (%) <sup>c</sup>                                | 7.4 (38.2)                             |
| $\langle I \rangle / \langle \sigma_I \rangle$               | 10.0 (1.9)                             |
| CC <sub>1/2</sub> in the last resolution shell               | 0.71                                   |
| CC* in the last resolution shell                             | 0.91                                   |
| Wilson B-factor (Å <sup>2</sup> ) <sup>d</sup>               | 49.2                                   |
| <b>Refinement</b>                                            |                                        |
| Resolution range (Å)                                         | 45.8–2.98 (3.08–2.98)                  |
| Number of reflections $R_{work}/R_{free}$                    | 29,991 / 1,499 (2,518 / 126)           |
| Atoms (non-H protein/ligands/solvent)                        | 10,183 / 127 / 7                       |
| Protein residues (resolved/sequence)                         | 1,278 / 1,390 <sup>ef</sup>            |
| $R_{work}$ (%)                                               | 20.0 (27.5)                            |
| $R_{free}$ (%)                                               | 25.3 (35.2)                            |
| RMSD bond length (Å)                                         | 0.003                                  |
| RMSD bond angle (°)                                          | 0.56                                   |
| Average B-factor (Å <sup>2</sup> ) (protein/ligands/solvent) | 53.2 / 63.0 / 29.2                     |
| Ramachandran plot (%) (favored/allowed/disallowed)           | 97.5 / 2.5 / 0                         |
| Poor rotamers (%)                                            | 0.27                                   |
| Clashscore                                                   | 2.73                                   |

<sup>a</sup> Numbers in parentheses correspond to the last resolution shell.

<sup>b</sup> Redundancy-independent merging R factor,  $R_{r.i.m.} = \sum_{hkl} \{N(hkl) / [N(hkl) - 1]\}^{1/2} \times$

$$\sum_i |I_i(hkl) - \langle I(hkl) \rangle| / \sum_{hkl} \sum_i I_i(hkl)^{1/2}$$

<sup>c</sup> Precision-indicating merging R factor,  $R_{p.i.m.} = \sum_{hkl} \{1/[N(hkl) - 1]\}^{1/2} \times \sum_i |I_i(hkl) - \langle I(hkl) \rangle| / \sum_{hkl} \sum_i I_i(hkl)$ <sup>d</sup>

<sup>d</sup> Maximum likelihood estimate of the overall *B*-value reported in *Phenix*.

<sup>e</sup> Residue count includes Pvl.

<sup>f</sup> Residue count excludes the first Ser after Ulp1 cleavage site.

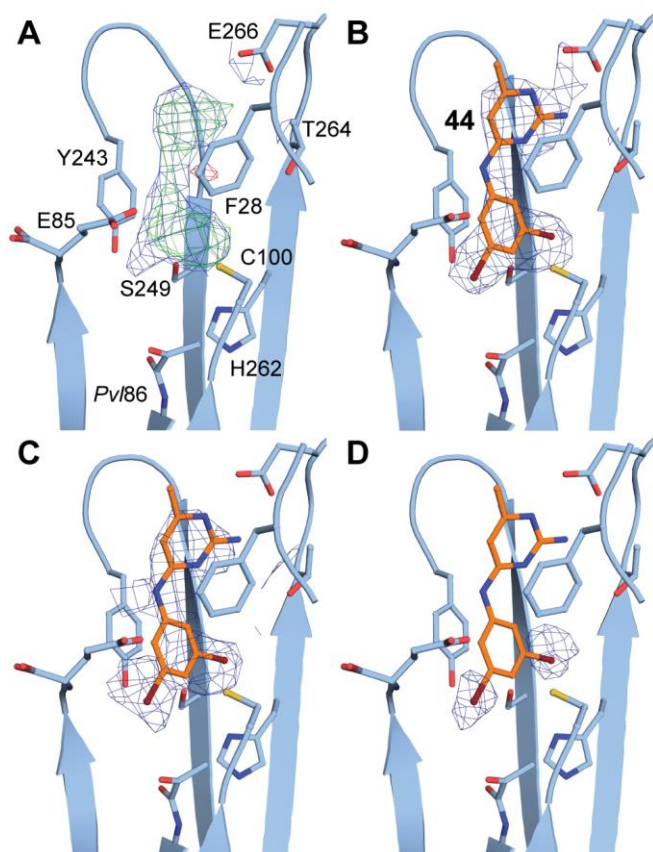

**Figure S1.** Placement of a ligand into the catalytic site of *TbAdoMetDC/prozyme* co-crystallized with **44**. **(A)** Positive (green mesh) and negative (red mesh)  $mF_o-DF_c$  electron density countered at 3 and  $-3 \sigma$ , respectively, and  $2mF_o-DF_c$  electron density (blue mesh) countered at  $1 \sigma$  after the first round of positional refinement before ligand coordinates were included in the model. **(B)**  $2mF_o-DF_c$  electron density (blue mesh) countered at  $1 \sigma$  observed for the final refined model including the bound ligand. **(C)** Simulated annealing composite omit  $2mF_o-DF_c$  electron density (blue mesh) countered at  $1 \sigma$  based on the final refined model including the bound ligand. **(D)** Anomalous difference map (blue mesh) showing positions of bromines in bound ligand countered at  $2 \sigma$ .

## References

1. Weiss, M. S. (2001) Global indicators of X-ray data quality. *J Appl Crystallogr* 34, 130-135. DOI: 10.1107/S0021889800018227.
